# Supplementary material for: Genome-Wide Detection of Genes Targeted by Non-Ig Somatic Hypermutation in Lymphoma
Source: PLoS One. 2012 Jul 12;7(7):e40332. doi: 10.1371/journal.pone.0040332 (PMC3395700; doi:10.1371/journal.pone.0040332)
Supplement: Table S3 — Stats of SHM hotspots in OCI-Ly1 identified using H3K4me2 ChIP-seq data. (XLS) [file pone.0040332.s006.xls]

## Sheet: LY110Dec20_H3K4me2_Run110412_s_
Gene	NumSNVs	BH	ObsRGYW	ExpRGYW	z-scoreRGYW	ObsWA	ExpWA	z-scoreWA	ObsRep	ExpRep	z-scoreRep	Ts/Tv
BCL2	72(42)	0	9	4	2.33	23	9	4.64	0	1	-1.31	50/22
IGLL5	21(21)	0	2	1	1.13	8	2	3.58	0	0	0	10/11
S1PR2	12(12)	0	3	1	2.88	2	1	1.51	0	0	0	9/3
MYO1E	12(11)	0	2	1	1.59	3	1	2.95	0	0	-0.25	7/5
RPS17	10(7)	1.84e-14	1	1	0.28	2	1	0.45	0	0	0	7/3
BCL7A	9(0)	9.54e-13	2	1	1.32	0	1	-0.83	0	0	-0.64	5/4
WASH3P	9(8)	9.54e-13	1	1	0.54	1	2	-0.42	0	0	0	7/2
BTG2	7(7)	3.63e-09	2	0	2.78	1	1	0.44	2	1	1.5	3/4
BACH2	6(3)	2.06e-07	2	0	3.76	0	0	-0.73	0	0	-0.54	3/3
TCL1A	5(5)	6.85e-06	2	0	4.05	2	1	1.34	0	0	0	1/4
WASH1	4(4)	0.000212	1	0	1.99	0	1	-0.82	0	0	0	2/2
ZNF286B	4(0)	0.000212	1	0	1.42	0	1	-0.91	0	0	0	4/0
SERPINA9	3(3)	0.00397	1	0	1.99	1	0	1.18	0	0	0	2/1
NBPF3	3(2)	0.00397	1	0	1.99	0	0	-0.44	0	0	0	0/3
MTSS1	3(1)	0.00397	1	0	2.84	0	0	-0.31	0	0	-0.74	2/1
MEPCE	3(2)	0.00397	1	0	2.05	0	0	-0.47	0	0	0	1/2
EBF1	3(0)	0.00397	2	0	4.71	0	0	-0.55	0	0	0	1/2
