# Supplementary material for: Genome-Wide Detection of Genes Targeted by Non-Ig Somatic Hypermutation in Lymphoma
Source: PLoS One. 2012 Jul 12;7(7):e40332. doi: 10.1371/journal.pone.0040332 (PMC3395700; doi:10.1371/journal.pone.0040332)
Supplement: Table S4 — Primer sequences and reporter sequences used in the Sanger sequencing validation, gene expression study, and dual-luciferase assay. (XLS) [file pone.0040332.s007.xls]

## Sheet: Primers used Validation PCR
	Sequence	Chr	Start	End	Size
BACH2_1F	CGGTCCCTCTCGTTTCCT	6	91061582	91061599	516
BACH2_1R	CACCCTACACTCCAGTCTCCA		91062077	91062097
BACH2_2F	CACCTTGACTTCATGGAGGA	6	91062127	91062146	479
BACH2_2R	GGAGGAGGAGCAGAGAGTAATAA		91062583	91062605
BACH2_4F	CGGAGAACTTTGCGTCCTT	6	91062925	91062943	432
BACH2_4R	CGCCGAATGTCAACAATGTA		91063337	91063356
BACH2_6F	CCACGAAAGACGAGGGTTG	6	91063654	91063672	475
BACH2_6R	ACCACCACCAAGCTTTCTTC		91064141	91064160
BACH2_8F	AGTGATGGCTGAAAGCAAGC	6	91064564	91064583	400
BACH2_8R	GCTCTCAAGCATCCCTTGTT		91064944	91064963
BCL2_1F	CTGGGCATCTTTTCTGGAAG	18	58960569	58960588	451
BCL2_1R	AAATGAAAGCAGATTTTTCTTAGCA		58960995	58961019
BCL2_2F	GAGGGGGTGTCTTCAATCAC	18	59137007	59137026	375
BCL2_2R	TTCTCTGCACAGGAAATTGG		59137362	59137381
BCL6_1F	TCACTCACAAAGATCTCCCTTTC	3	188944377	188944399	475
BCL6_1R	CCGAGGAGAGAGACTGATGG		188944832	188944851
BCL6_2F	CGCCATCAGTCTCTCTCCTC	3	188944830	188944849	501
BCL6_2R	TTTCCCTCTTTTCTCGCTTG		188945311	188945330
BTG2_1F	AACACACCCCCTACCCCTAC	1	201540580	201540599	490
BTG2_1R	GCTGTCGTCAGTGCTAGGAA		201541050	201541069
BTG2_3F	AGCGAGCAGAGGCTTAAGGT	1	201541448	201541467	543
BTG2_3R	CAGCAACCAGTGGACTACCC		201541971	201541990
BTG2_4F	GCTGTGCCTGGGGTAGTC	1	201541961	201541980	478
BTG2_4R	GGGCCTCTGGAGACCTGT		201542421	201542438
BTG2_5F	GCCCTGAAACTTCAGCTCAC	1	201542403	201542422	478
BTG2_5R	GGGAAACCAGTGGTGTTTGT		201542861	201542880
BTG2_6F	ACCACTGGTTTCCCGAAAAG	1	201542867	201542886	391
BTG2_6R	GAGGTATGTGGTGGCCTGTT		201543238	201543257
MYO1E_2F	GTCTCCCTGGCTCTTGACAG	15	57451343	57451362	422
MYO1E_2R	GTCGCGAAACTTTCTGTGG		57451746	57451764
MYO1E_3F	AACCCGGCCACAGAAAGT	15	57451739	57451756	455
MYO1E_3R	GTCTCGCCCTCACCTAGCAC		57452174	57452193
MYO1E_4F	ATTGGCGGTGCTAGGTGAG	15	57452167	57452185	329
MYO1E_4R	TTTGGAAACTCCAGCAGCTC		57452476	57452495

## Sheet: Reporter Assay
BCL6 promoter sequence used in reporter assay (wide-type)
AAATCAGAAGCAAAAATCCATAAACCATCAAAATACAGAAACCAAAAATCCCAAGCCACCACACCAGAAAGAAAAAAACCCAGAACAACAGCAAAAACCCCTGTCCTAAATAAAAATAAAGCAAATGAACCCACCGAAAACTGCTTGGCAAATATTTTTCTCGTGGTGCCTAATATTCTAGTTGGAAAGAGCTGTGATGTTTATTTTATTTTATTTTTCTCTTACTCGCCTCTCTAACCCTACTATATATATAACATACTTTTCCCAGTGGTTCAAACCTCTCGCTCCCTTTTGTGCATTTAGCTCGATCTGCTGAGTTTATGGGTAAGAAAGAAGGAATTAGCCCCAGACCCCGGGAAAGCAAAGCGCACTCCCCCTCTTATGTCACCGAATAGCAAA…
BCL6-SHM1 (Chr3, 188944983, GàA) site-mutagenesis primers:
Forward: GATCTTCCTAATGAGAGTCGAGTGTTTTG
Reverse: GTTTTGTGAGCTGAGAGTAATCCTTCTAG
BCL6-SHM2 (Chr3, 188945189, CàT) site-mutagenesis primers:
Forward: ACTCCGGGAGGCAAAAAGGGAGACTGCCCGCTCG
Reverse: CGAGCGGGCAGTCTCCCTTTTTGCCTCCCGGAGT
BCL6-SHM3 (Chr3, 188945214, CàT) site-mutagenesis primers:
Forward: CTGTCCTTCTGGATAACTCCGGGAGGCAAAAAG
Reverse: CTTTTTGCCTCCCGGAGTTATCCAGAAGGACAG
BCL6-SHM4 (Chr3, 188945746, CàT) site-mutagenesis primers:
Forward: CAAATGCTTTGACTCCAAGTTTTCTATGTG
Reverse:CACATAGAAAACTTGGAGTCAAAGCATTTG
BACH2 promoter sequence used in reporter assay (wide-type)
AGGCACCAGCACAACACTAACACAACCTTATTTTATTGCAAATGTACATTCAGCCTAAATCCTAATTACCTTCTGTAAAATCCTAACCACCACCAAGCTTTCTTCTGACAGGGCACTCACACGACGGCCTTTAAGGGCAGCAACAACATCCTAAGAGCCGCAGAAAGGAAAGGCAGGGGAGAGTGGCTGGAAGGCAGTAGGAGCTGGGGCTGAAGCCCGGGAGGTTGGCTTTTAATGTCCTCCTGAAATTGACCACTCTCTTTCCAAAAACACTGGCTTGGGGGCTTAAAGGTTCGCTCAGTAGGGCAGGCGGAGGGCCTCCTGAAAAGGATTGAGAAGTCAACATTCAAAAGGCTGCTTTTACTCGCCCGGTCCCCACCCAAAAGGGAGTCCGGTCAG…
BACH2-SHM1 (Chr6, 91062534, GàA) site-mutagenesis primers:
Forward: GCGCGAGTCGCAGCAGCTGTCAGACC
Reverse: GGTCTGACAGCTGCTGCGACTCGCGC
BACH2-SHM2 (Chr6, 91064072, CàT) site-mutagenesis primers:
Forward: CAGAAAGGAAAGACAGGGGAGAGTGGCTGGAAG
Reverse: CTTCCAGCCACTCTCCCCTGTCTTTCCTTTCTG
